# Supplementary material
Source: Springer Nature journal article supplement (https://www.springermedizin.de/resource/supplementary/12885_2011_2924_MOESM7_ESM.pdf/9462286)

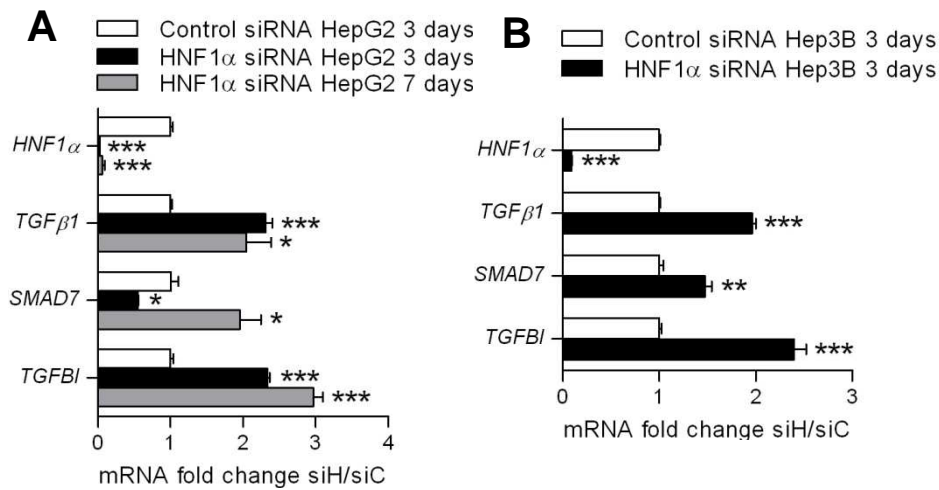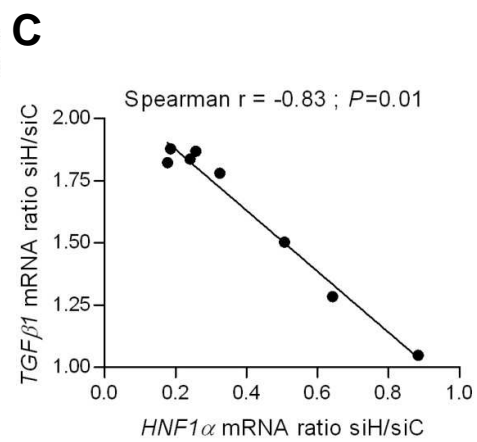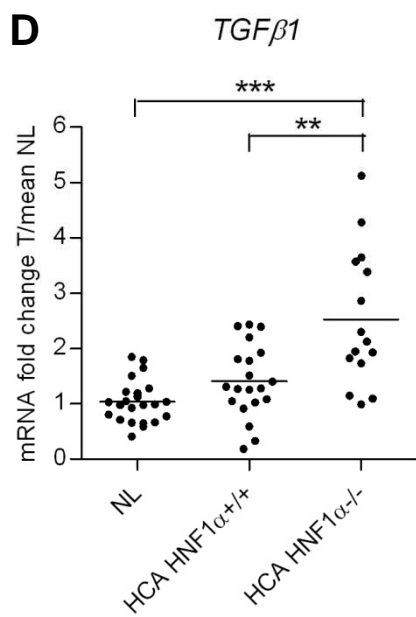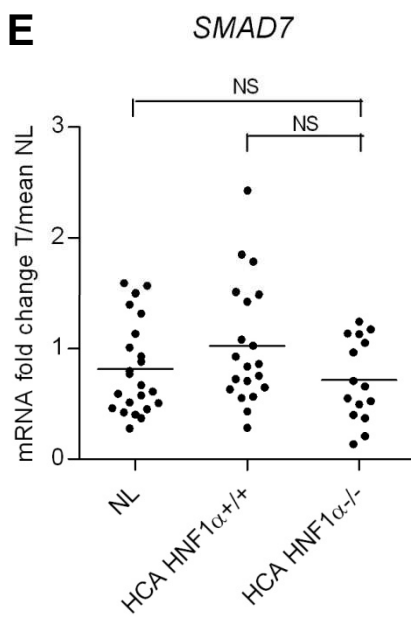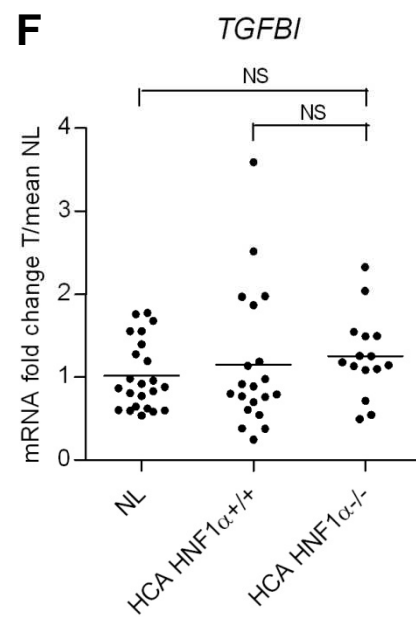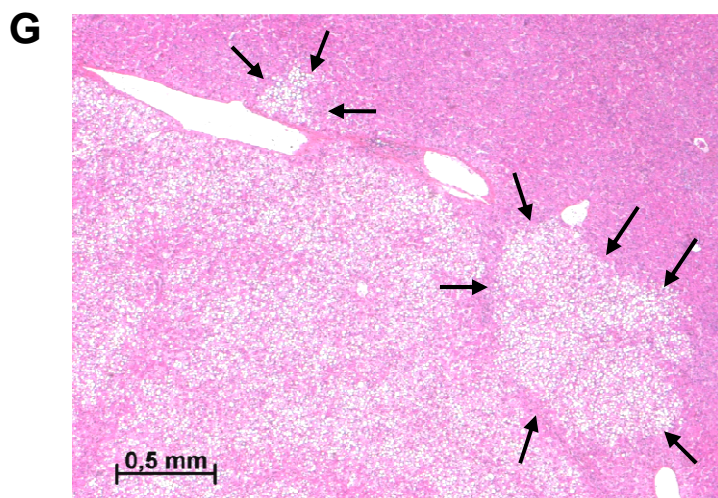

Supplement: MOESM7 [file 9462286]
